# Supplementary material for: Tm 3+ -mediated energy bridge in lead-free double perovskites: suppressing multiphonon relaxation for multifunctional photonic applications
Source: Royal Society of Chemistry journal article supplement (doi:10.1039/d5qi02407b), 2025-12-18
Supplement: d5qi02407b1.pdf [file d5qi02407b1.pdf]

## **Tm<sup>3+</sup>-Mediated Energy Bridge in Lead-Free Double Perovskites: Suppressing Multiphonon Relaxation for Multifunctional Photonic Applications**

Jiaqi Zhao<sup>a</sup>, Zheng Fu<sup>a</sup>, Kejie Li<sup>a</sup>, Mengmeng Dai<sup>a</sup>, Zhiying Wang<sup>b, \*</sup>, Guiying Liang<sup>c</sup>, Yanling Wei<sup>c, \*</sup> and Zuoling Fu<sup>a, \*</sup>

---

<sup>a</sup>Key Laboratory of Physics and Technology for Advanced Batteries, College of Physics, Jilin University, Changchun 130012, China. E-mail : zlfu@jlu.edu.cn

<sup>b</sup>Ministry of Education Key Laboratory for Cross-Scale Micro and Nano Manufacturing, Nanophotonics and Biophotonics Key Laboratory of Jilin Province, School of Physics, Changchun University of Science and Technology, Changchun, 130022, China. E-mail: zhiyingw@cust.edu.cn

<sup>c</sup>School of Data Science and Artificial Intelligence, Jilin Engineering Normal University, Changchun 130052, China. E-mail: weiyanning@jlenu.edu.cn

To explicitly define the luminescence *LIR* models, we have completed the detailed descriptions of the transitions and equations below:

(i) *LIR*<sub>1</sub>: Defined as the intensity ratio of the emission from Er<sup>3+</sup>: <sup>2</sup>H<sub>11/2</sub> → <sup>4</sup>I<sub>15/2</sub> (530 nm) to Tm<sup>3+</sup>: <sup>1</sup>G<sub>4</sub> → <sup>3</sup>H<sub>6</sub> (475 nm), i.e.,

$$LIR_1 = \frac{I_{530 \text{ nm}}}{I_{475 \text{ nm}}}. \text{ This non-thermally coupled level (non-TCL) model follows the empirical fitting equation:}$$

$$LIR_1 = A_1 + B_1 \cdot \exp\left(\frac{C_1}{T}\right)$$

Where  $A_1$ ,  $B_1$  and  $C_1$  are represented as constants, respectively, and T is the absolute temperature (Figs. 11a and 12a).

(ii) *LIR*<sub>2</sub>: Defined as the ratio of Er<sup>3+</sup>: <sup>2</sup>H<sub>11/2</sub> → <sup>4</sup>I<sub>15/2</sub> (530 nm) to Er<sup>3+</sup>: <sup>4</sup>S<sub>3/2</sub> → <sup>4</sup>I<sub>15/2</sub> (550 nm), i.e.,  $LIR_2 = \frac{I_{530 \text{ nm}}}{I_{550 \text{ nm}}}$ . This thermally coupled level (TCL) model adheres to the Boltzmann distribution:

$$LIR_2 = A_2 \cdot \exp\left(-\frac{\Delta E}{K_B T}\right)$$

Where  $A_2$  is represented as a constant,  $\Delta E = 0.0984$  eV (derived from the energy gap between <sup>2</sup>H<sub>11/2</sub> and <sup>4</sup>S<sub>3/2</sub>),  $K_B$  is the Boltzmann constant, and the fitting yields  $R^2 > 0.99$  (Figs. 11b and 12b).

(iii) *LIR*<sub>3</sub>: Defined as the ratio of Er<sup>3+</sup>: <sup>2</sup>H<sub>11/2</sub> → <sup>4</sup>I<sub>15/2</sub> (530 nm) to Er<sup>3+</sup>: <sup>4</sup>F<sub>9/2</sub> → <sup>4</sup>I<sub>15/2</sub> (660 nm), i.e.,  $LIR_3 = \frac{I_{530 \text{ nm}}}{I_{660 \text{ nm}}}$ . The empirical equation is used in this mixed-mode model:

$$LIR_3 = A_3 + B_3 \cdot \exp\left(\frac{C_3}{T}\right)$$

Where  $A_3$ ,  $B_3$  and  $C_3$  are represented as constants, respectively, with  $R^2 > 0.99$  (Figs. 11c and 12c).

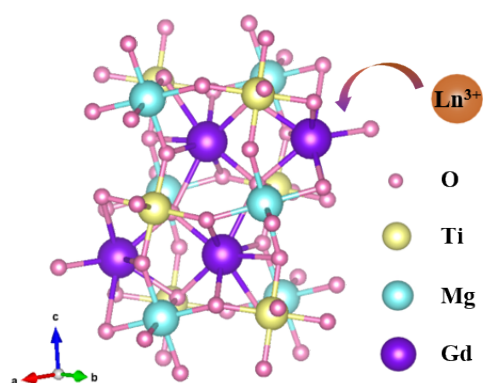

**Fig. S1** Crystal structure of  $\text{Ln}^{3+}$ -doped GMTO double perovskite.

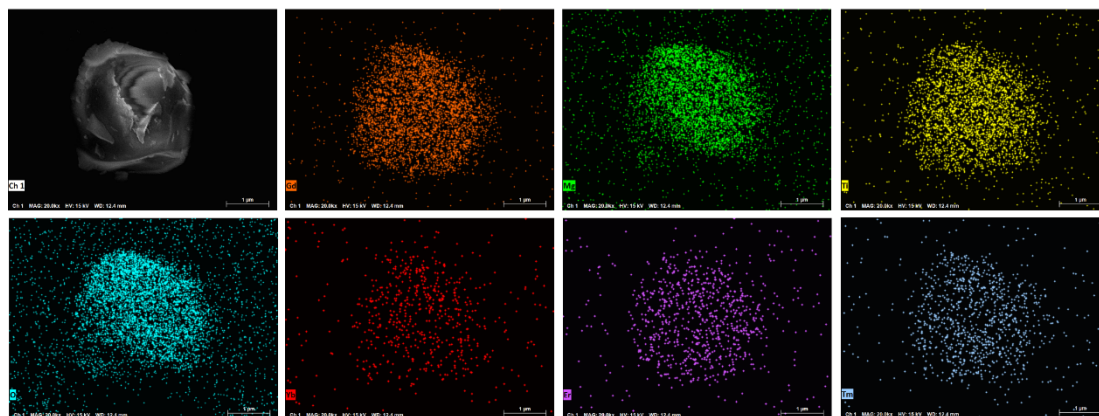

**Fig. S2** FE-SEM image and elemental mapping images of the GMTO: 7%  $\text{Yb}^{3+}$ , 2%  $\text{Er}^{3+}$ , 3%  $\text{Tm}^{3+}$  sample.

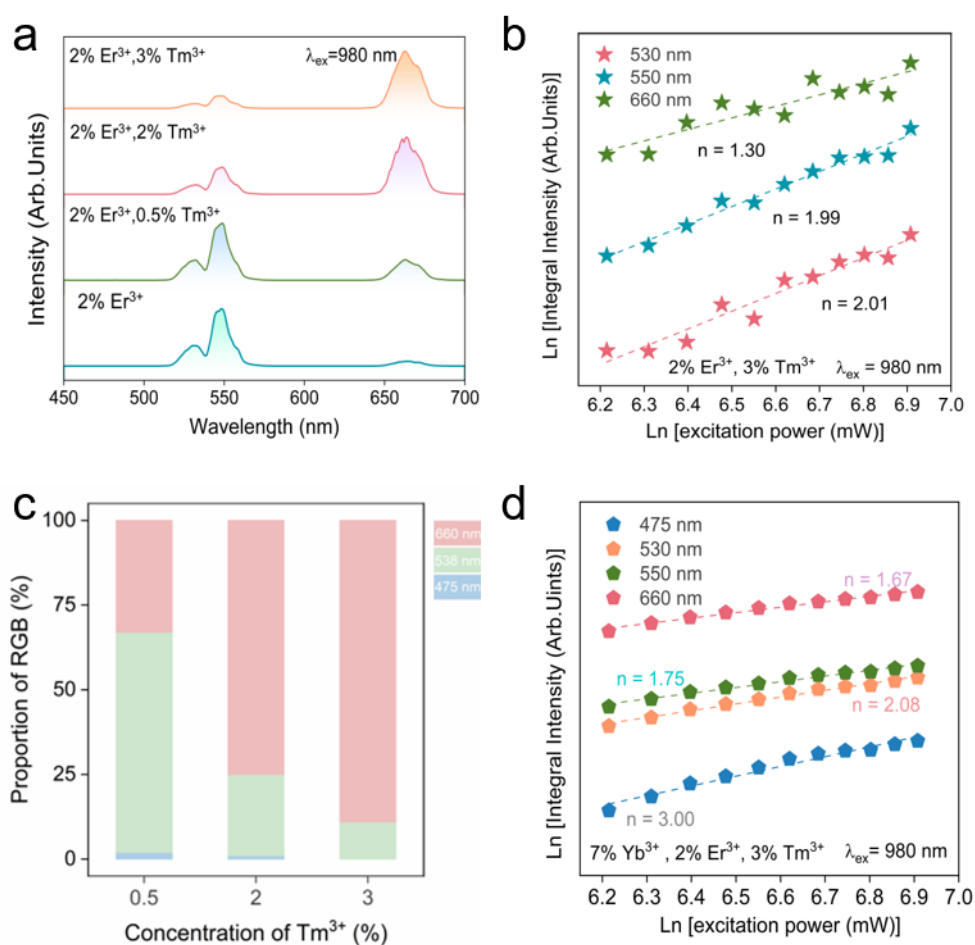

**Fig. S3** (a) UC emission spectra of GMTO: 2%  $\text{Er}^{3+}$ ,  $x\text{Tm}^{3+}$  ( $x = 0\text{--}3\%$ ) under 980 nm excitation. (b) Calculated power dependence of the UC luminescence and linear fittings about GMTO: 2% $\text{Er}^{3+}$ , 3% $\text{Tm}^{3+}$ . (c) Proportion of GMTO:  $\text{Yb}^{3+}$ ,  $\text{Er}^{3+}$ ,  $\text{Tm}^{3+}$  integral intensity with different concentrations of  $\text{Tm}^{3+}$ . (d) Calculated power dependence of the UC luminescence and linear fittings about GMTO: 7% $\text{Yb}^{3+}$ , 2% $\text{Er}^{3+}$ , 3% $\text{Tm}^{3+}$ .

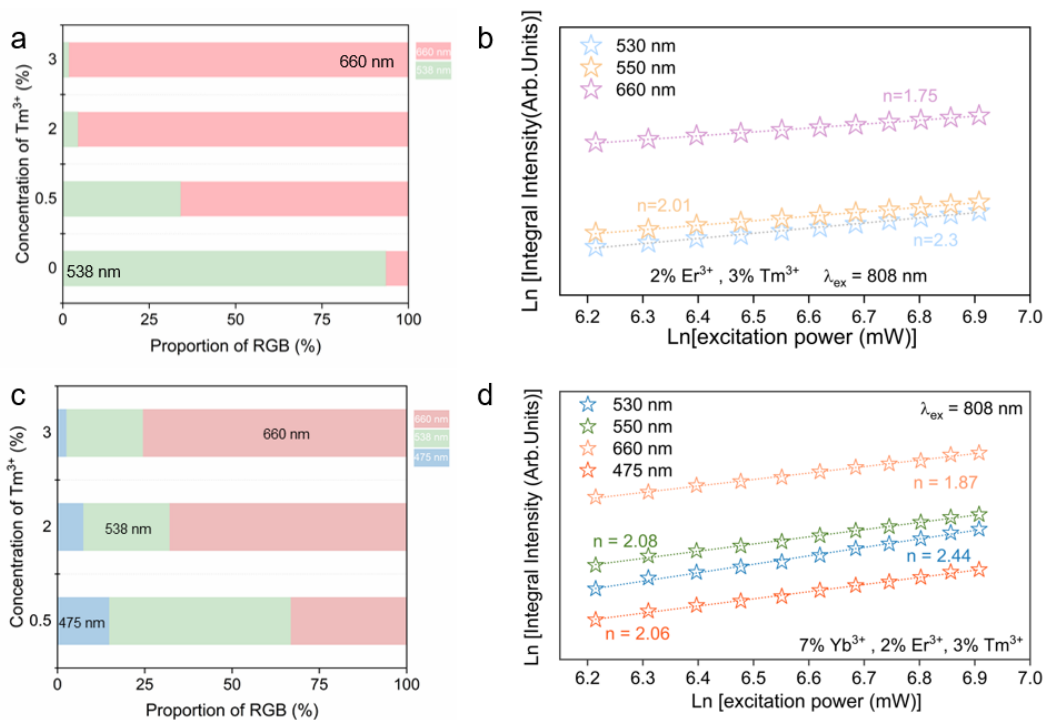

**Fig.S4** (a) Proportion of GMTO: 2%Er<sup>3+</sup>, 3%Tm<sup>3+</sup> integral intensity with different concentrations of Tm<sup>3+</sup>. (b) Calculated power dependence of the UC luminescence and linear fittings of GMTO: 2%Er<sup>3+</sup>, 3%Tm<sup>3+</sup>. (c) Proportion of GMTO: 7%Yb<sup>3+</sup>, 2%Er<sup>3+</sup>, 3%Tm<sup>3+</sup> integral intensity. (d) Calculated power dependence of the UC luminescence and linear fittings of GMTO: 7%Yb<sup>3+</sup>, 2%Er<sup>3+</sup>, 3%Tm<sup>3+</sup>.

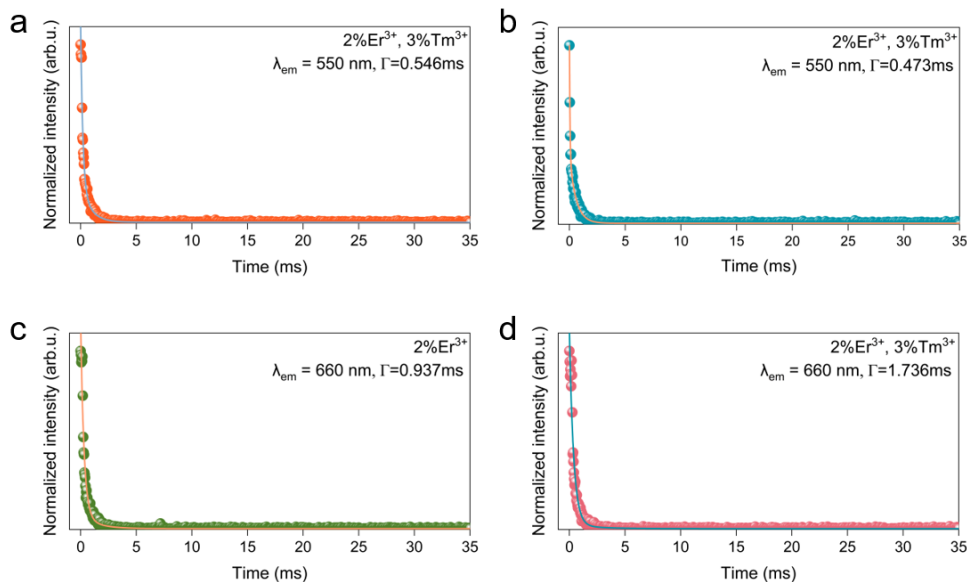

**Fig.S5** (a and b) UC decay lifetimes of green emission at 550 nm of Er<sup>3+</sup> in the GMTO: 2%Er<sup>3+</sup> and GMTO: 2%Er<sup>3+</sup>, 3%Tm<sup>3+</sup> under 808 nm excitation, respectively. (c and d) UC decay lifetimes of red emission at 660 nm of Er<sup>3+</sup> in the GMTO: 2%Er<sup>3+</sup> and GMTO: 2%Er<sup>3+</sup>, 3%Tm<sup>3+</sup> under 808 nm excitation, respectively

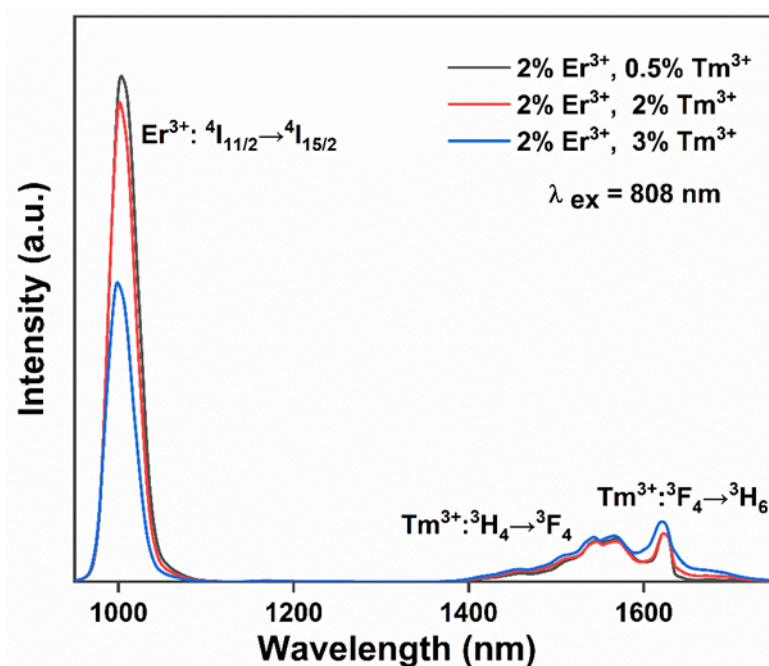

Fig. S6 NIR emission spectra of  $\text{Er}^{3+}$ ,  $x\text{Tm}^{3+}$  ( $x = 0\text{-}3\%$ ) co-doped system upon 808 nm excitation.

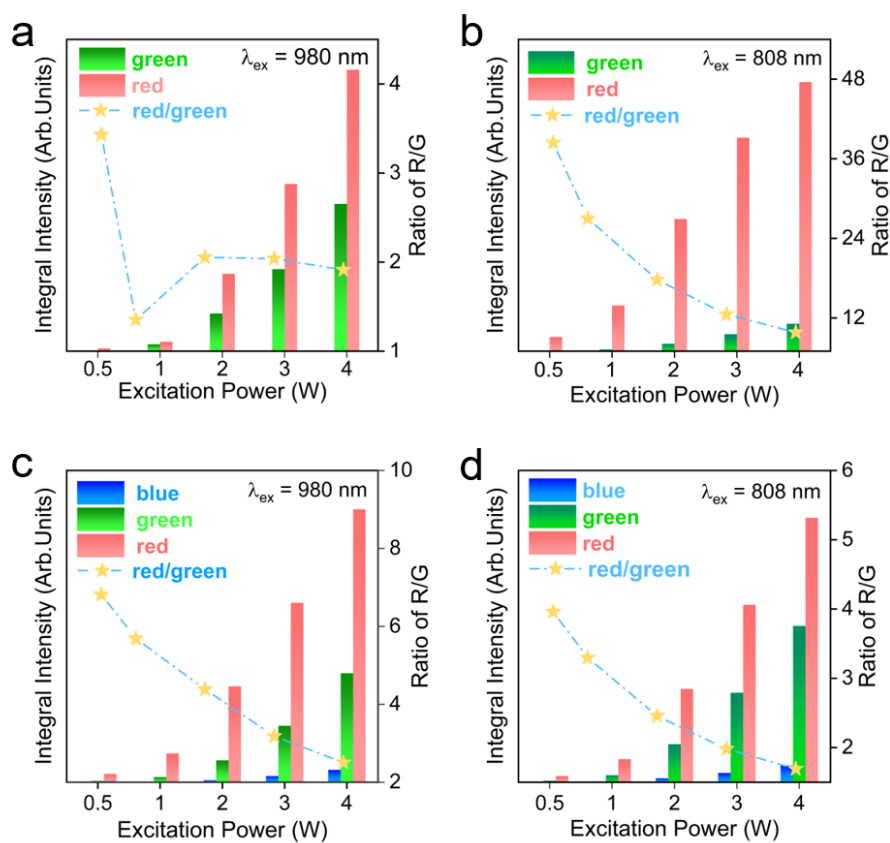

Fig. S7 UC emission integrated intensity and red-to-green ratio of the corresponding samples as a function of laser power.

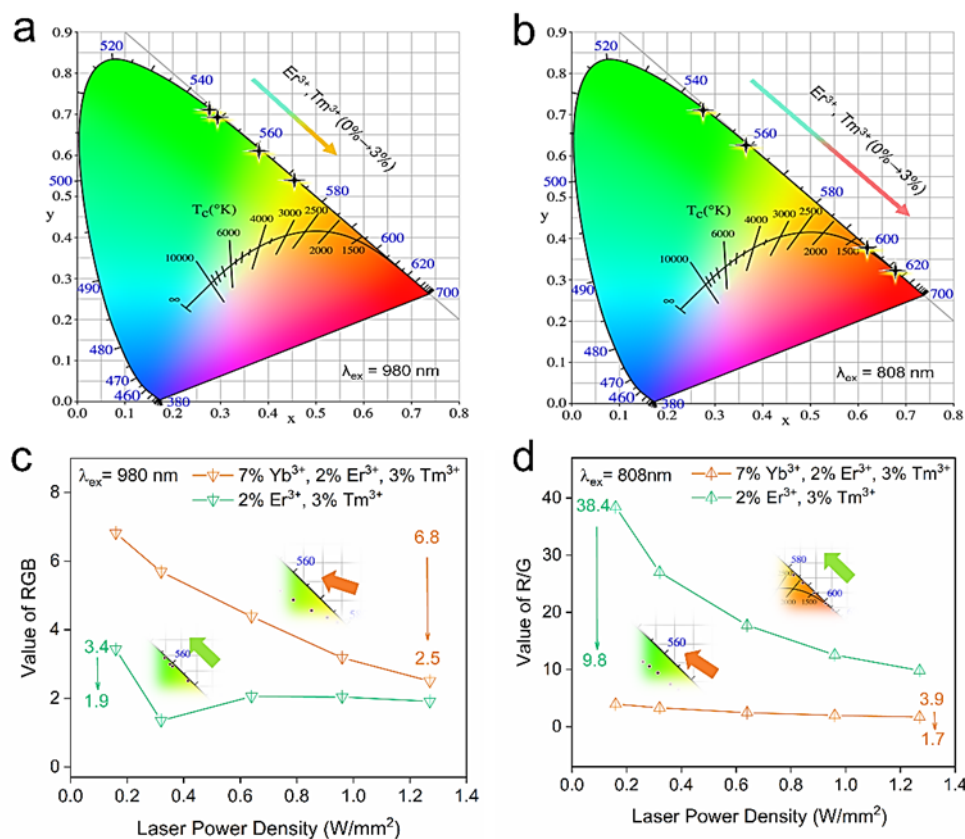

**Fig. S8** (a, b) CIE chromatic coordinates of the UC emission in the GMTO: 2%  $Er^{3+}$ , 0.5%  $Tm^{3+}$  phosphor by varying concentration of  $Tm^{3+}$  under 980/808 nm excitation. (c, d) R/G emission ratio of GMTO:  $Er^{3+}$ ,  $xTm^{3+}$  ( $x = 0-3\%$ ) and GMTO:  $Yb^{3+}$ ,  $Er^{3+}$ ,  $xTm^{3+}$  ( $x = 0.5-3\%$ ) with the variation of laser power density.

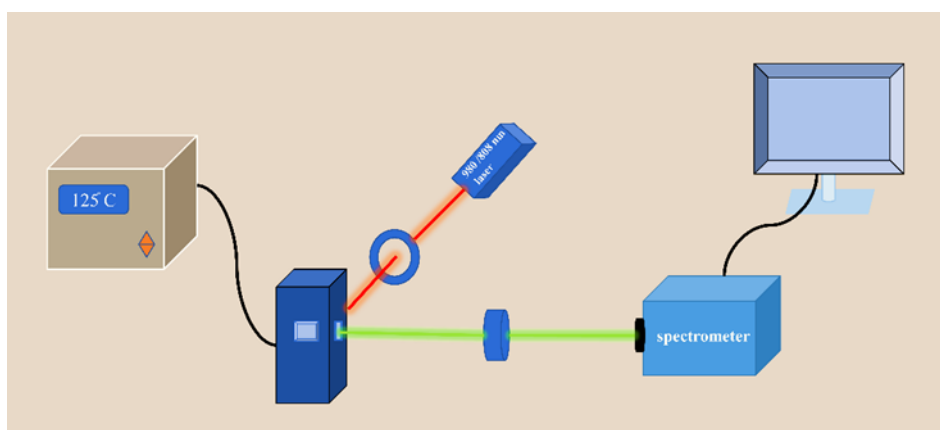

**Fig. S9** Schematic diagram of the experimental equipment for temperature sensing measurements.

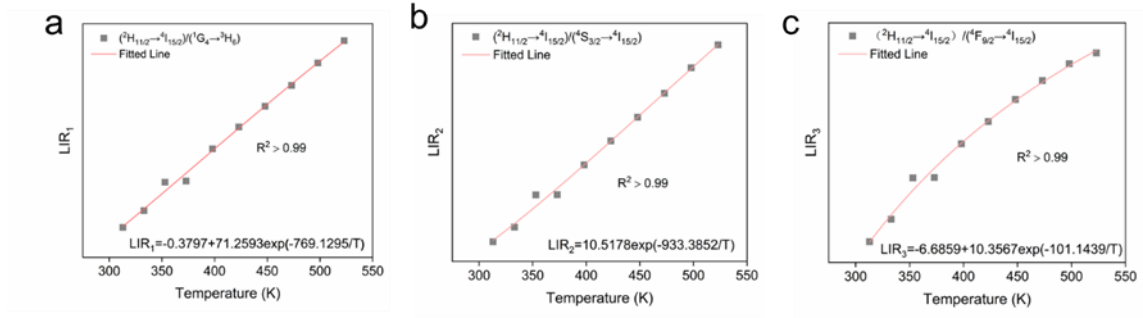

**Fig. S10** (a-c) Temperature-dependent  $LIR$  values of GMTO:7%Yb<sup>3+</sup>, 2%Er<sup>3+</sup>, 0.5%Tm<sup>3+</sup> upon 980 nm excitation.

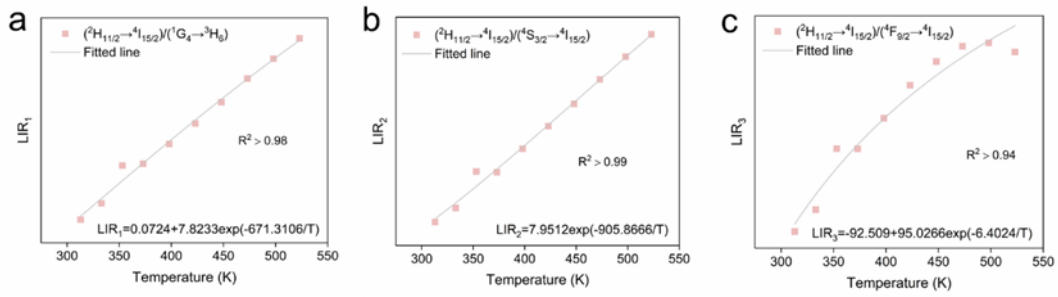

**Fig. S11** (a-c) Temperature-dependent  $LIR$  values of GMTO:7%Yb<sup>3+</sup>, 2%Er<sup>3+</sup>, 0.5%Tm<sup>3+</sup> upon 808 nm excitation.

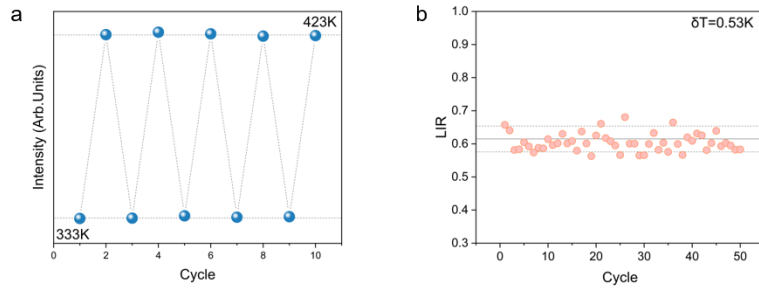

**Fig. S12** (a) Thermal cycling stability (10 cycles between 333 and 423 K) of the GMTO:7%Yb<sup>3+</sup>, 2%Er<sup>3+</sup>, 0.5%Tm<sup>3+</sup> under 980 nm excitation. (a) Repeatability tests (25 cycles at 333 K) of the  $LIR_2$  signals under 980 nm excitation.



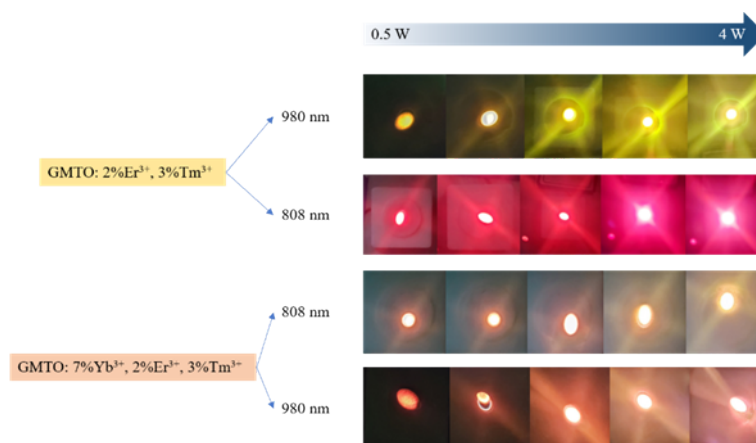

**Fig. S13** Images of GMTO: 2%Er<sup>3+</sup>, 3%Tm<sup>3+</sup> and GMTO: 7%Yb<sup>3+</sup>, 2%Er<sup>3+</sup>, 3%Tm<sup>3+</sup> under different excitation wavelengths and powers.

**Table S1.** Refinement Results of Gd<sub>2</sub>MgTiO<sub>6</sub>: 7% Yb<sup>3+</sup>, 2% Er<sup>3+</sup>, 3% Tm<sup>3+</sup>.

| Refinement Results of GMTO |                        |                                           |                          |                            |                                                                            |
|----------------------------|------------------------|-------------------------------------------|--------------------------|----------------------------|----------------------------------------------------------------------------|
| Space<br>Group<br>P 21/n   | Symmetry<br>Monoclinic | a=5.36428 Å<br>b=5.60566 Å<br>c=7.68344 Å | V=231.043 Å <sup>3</sup> | α=90<br>β=89.87543<br>γ=90 | R <sub>wp</sub> =2.44%<br>R <sub>p</sub> =1.95%<br>Chi <sup>2</sup> =1.70% |

**Table S2.** Summary of the  $S_r$  value corresponding to the Ln<sup>3+</sup>-doped LIR thermometers.

| Phosphors                                                                                               | $\lambda_{ex}(nm)$ | Transitions                                                                                                                                                                                        | Temperature(K) | $S_r(\%K^{-1})$      | Refs         |
|---------------------------------------------------------------------------------------------------------|--------------------|----------------------------------------------------------------------------------------------------------------------------------------------------------------------------------------------------|----------------|----------------------|--------------|
| Na <sub>3</sub> Gd(VO <sub>4</sub> ) <sub>2</sub> :<br>Yb <sup>3+</sup> /Er <sup>3+</sup>               | 980                | <sup>2</sup> H <sub>11/2</sub> , <sup>4</sup> S <sub>3/2</sub> → <sup>4</sup> I <sub>15/2</sub>                                                                                                    | 291-578        | 0.83                 | [32]         |
| TeO <sub>2</sub> -ZnO-BaO:<br>Yb <sup>3+</sup> /Ho <sup>3+</sup>                                        | 980                | <sup>5</sup> F <sub>5</sub> / <sup>5</sup> F <sub>4</sub> , <sup>5</sup> S <sub>2</sub> → <sup>5</sup> I <sub>8</sub>                                                                              | 303-503        | 0.41                 | [42]         |
| NaLuF <sub>4</sub> : Ho <sup>3+</sup> /Yb <sup>3+</sup>                                                 | 980                | <sup>5</sup> F <sub>1</sub> , <sup>5</sup> G <sub>6</sub> / <sup>5</sup> F <sub>2,3</sub> , <sup>3</sup> K <sub>8</sub> → <sup>5</sup> I <sub>8</sub>                                              | 390-780        | 0.83                 | [43]         |
| YOF: Tm <sup>3+</sup> /Yb <sup>3+</sup>                                                                 | 980                | <sup>3</sup> H <sub>4</sub> → <sup>3</sup> H <sub>6</sub>                                                                                                                                          | 190-300        | 0.12                 | [33]         |
| Ca <sub>2</sub> MgWO <sub>6</sub> : Er <sup>3+</sup> /Yb <sup>3+</sup>                                  | 980                | <sup>2</sup> H <sub>11/2</sub> / <sup>4</sup> F <sub>9/2</sub> → <sup>4</sup> I <sub>15/2</sub><br><sup>2</sup> H <sub>11/2</sub> / <sup>4</sup> S <sub>3/2</sub> → <sup>4</sup> I <sub>15/2</sub> | 303-573        | 0.47<br>0.92         | [44]         |
| Ba <sub>5</sub> Gd <sub>8</sub> Zn <sub>4</sub> O <sub>12</sub> :<br>Yb <sup>3+</sup> /Tm <sup>3+</sup> | 980                | <sup>1</sup> G <sub>4(1,2)</sub> → <sup>3</sup> H <sub>6</sub>                                                                                                                                     | 300-510        | 0.56                 | [34]         |
| Gd <sub>2</sub> MgTiO <sub>6</sub> :<br>Yb <sup>3+</sup> /Er <sup>3+</sup> /Tm <sup>3+</sup>            | 980                | LIR <sub>1</sub><br>LIR <sub>2</sub><br>LIR <sub>3</sub>                                                                                                                                           | 313-523        | 0.84<br>0.95<br>0.95 | This<br>work |
|                                                                                                         | 808                | LIR <sub>1</sub><br>LIR <sub>2</sub><br>LIR <sub>3</sub>                                                                                                                                           | 313-523        | 0.64<br>0.92<br>1.03 | This<br>work |
